# Supplementary material
Source: PubMed Central journal article supplement (PMC4564988)
Supplement: mmc1.pdf [file mmc1.pdf]

The American Journal of Human Genetics

Supplemental Data

## **Mutations in *SPATA5* Are Associated with Microcephaly, Intellectual Disability, Seizures, and Hearing Loss**

**Akemi J. Tanaka, Megan T. Cho, Francisca Millan, Jane Juusola, Kyle Retterer, Charuta Joshi, Dmitriy Niyazov, Adolfo Garnica, Edward Gratz, Matthew Deardorff, Alisha Wilkins, Xilma Ortiz-Gonzalez, Katherine Mathews, Karin Panzer, Eva Brilstra, Koen L.I. van Gassen, Catharina M.L. Volker-Touw, Ellen van Binsbergen, Nara Sobreira, Ada Hamosh, Dianalee McKnight, Kristin G. Monaghan, and Wendy K. Chung**

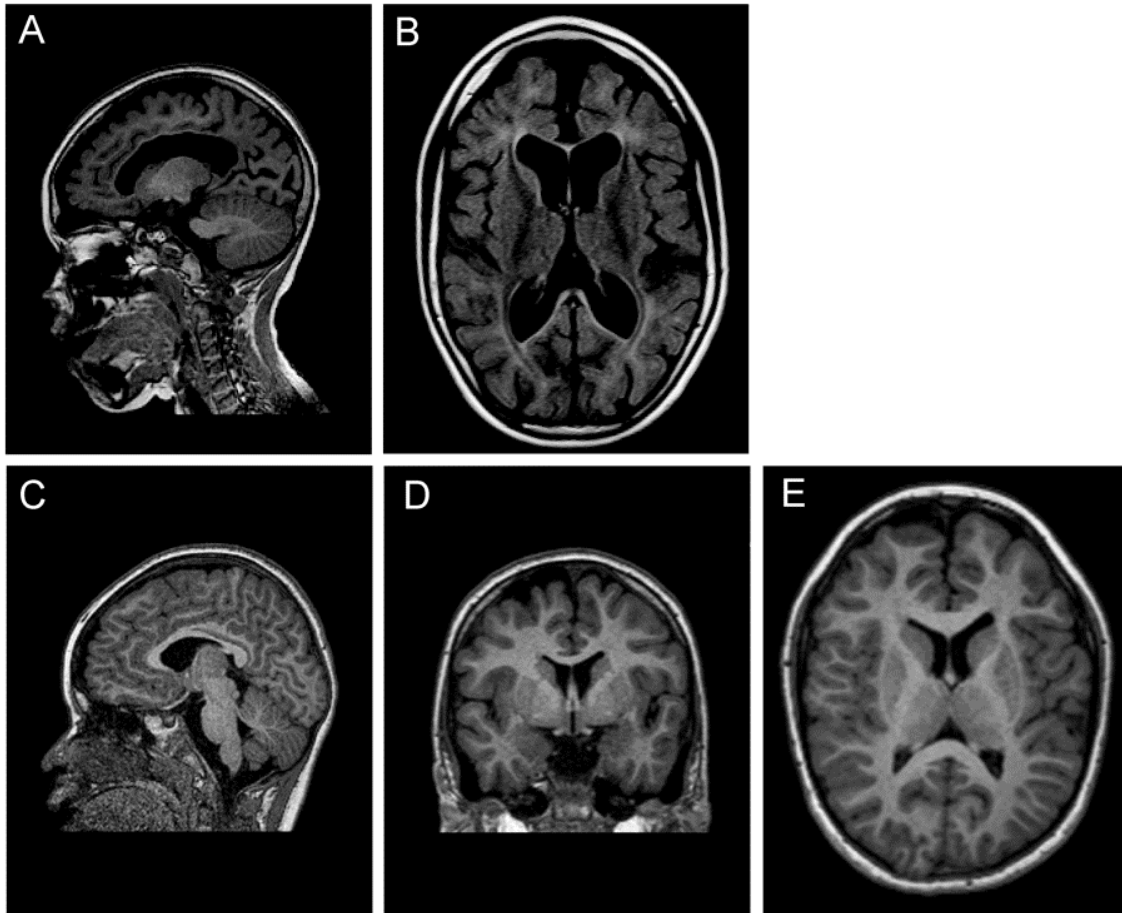

**Figure S1.** Brain imaging data for individuals with *SPATA5* variants. (A) Sagittal and (B) axial images of Individual 1 at 5 years of age show hypoplasia of the corpus callosum and prominence of bilateral ventricles and subarachnoid spaces with paucity of the white matter. (C) Sagittal (D) coronal and (E) axial images of Individual 6 at 7 years of age with progressive diffuse atrophy and extra-axial arachnoid collections.

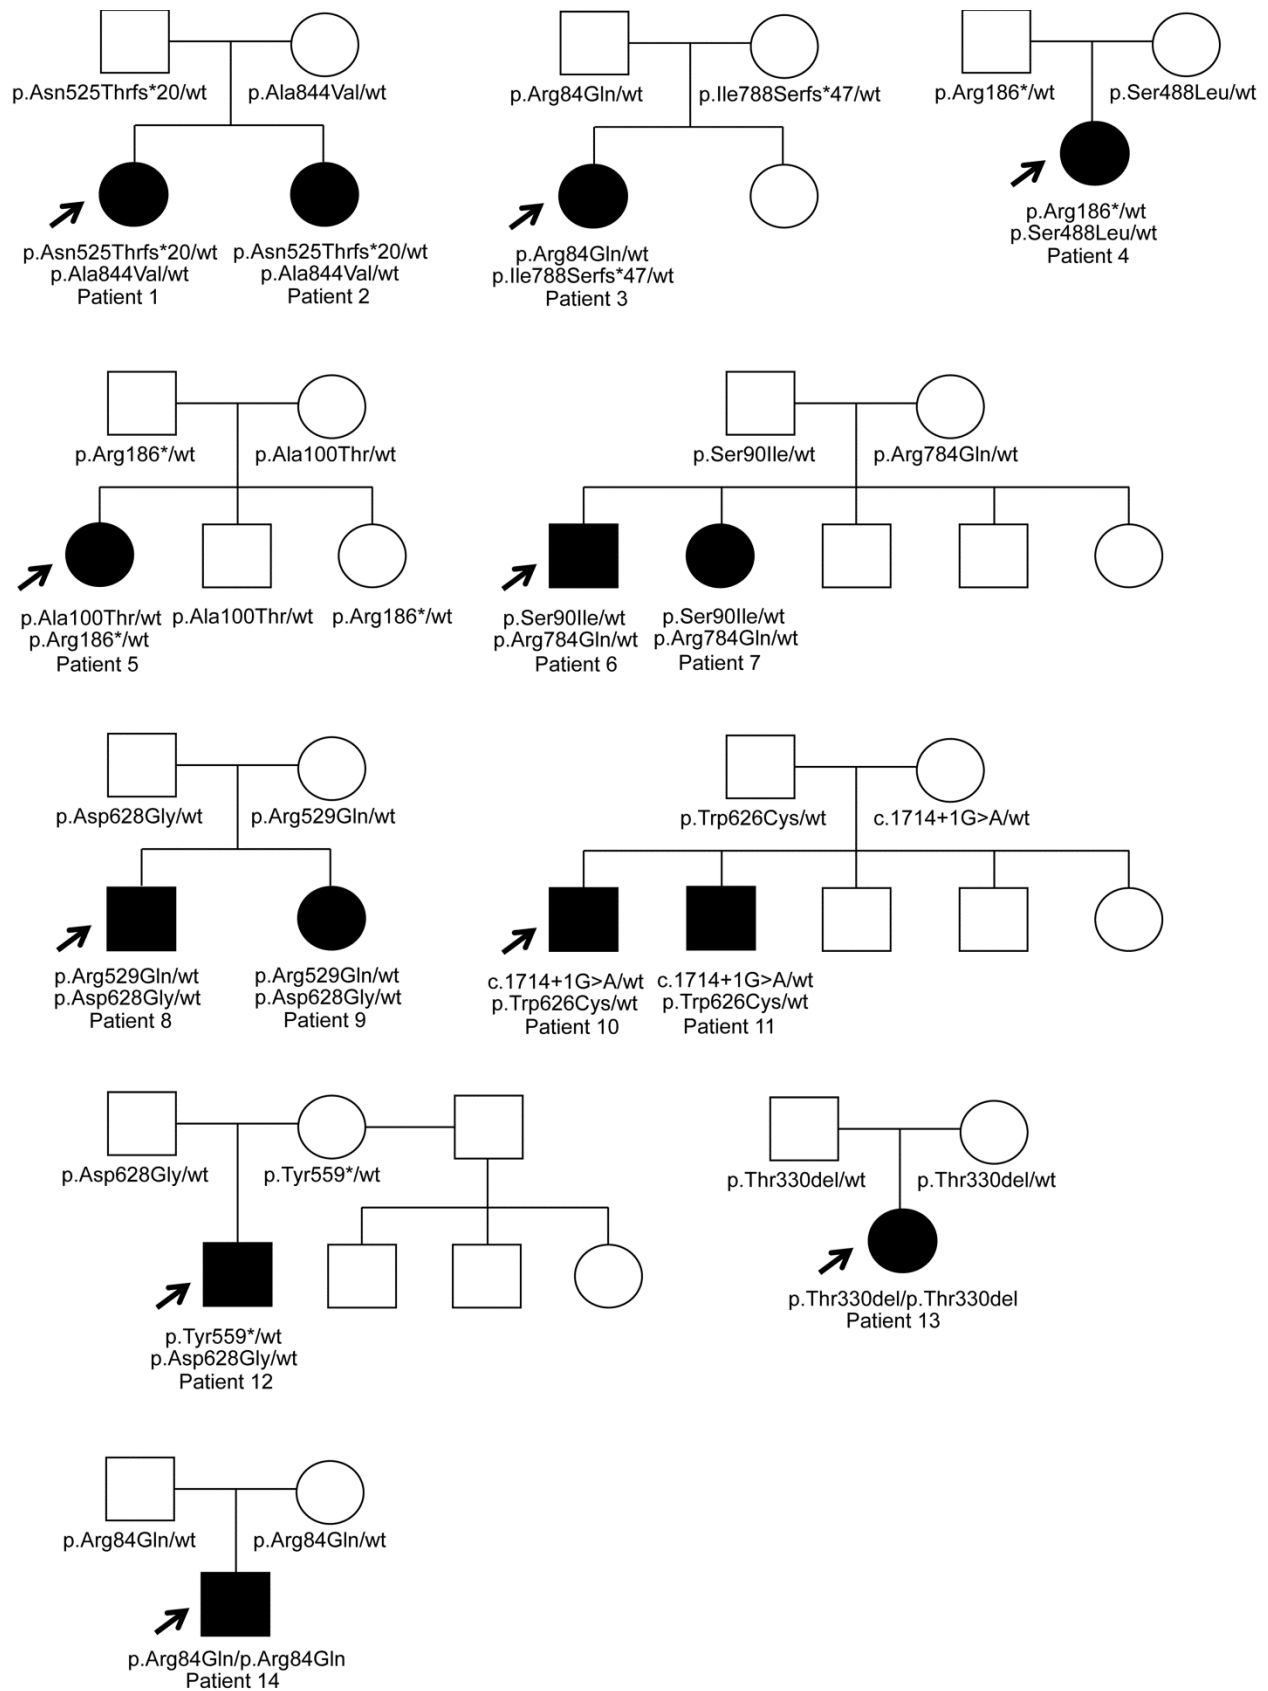

**Figure S2.** Family pedigrees and genotypes. The affected individuals are represented by filled symbols, and the proband individuals are indicated by arrows. Genotype of the respective mutations is indicated below the symbols of the available individuals.

**Table S1. Variants identified from WES of seven families**

|                                       | Filtering results | Manual review | Resulting genes of interest |
|---------------------------------------|-------------------|---------------|-----------------------------|
| Homozygous (# seq changes)            | 82 (89)           | 1 (1)         | 1 (1)                       |
| Compound Heterozygous (# seq changes) | 276 (684)         | 1 (2)         | 1 (2)                       |
| <i>De novo</i> (# seq changes)        | 149 (157)         | 1 (1)         | 0 (0)                       |
| X-linked genes (# seq changes)        | 41 (44)           | 5 (5)         | 0 (0)                       |
| Total genes (# seq changes)           | 548 (974)         | 8 (9)         | 1 (3)                       |

Table S2. Detailed clinical features of patients with mutations in *SPATA5*

| Patient | Age   | Sex | Proband/sibling | Mutation                      | Muscle Tonicity                                      | Spasticity                               | DD | Head Circumference                  | Age at Sitting        | Age at Walking | Verbal Skills | Vision                                                                                   | Hearing                                                         | Brain MRI                                                                                        | Seizure                                                                                               | EEG                                                                                                                 | GI                                     | Immunodeficiency | Thrombocytopenia                                                                                  |
|---------|-------|-----|-----------------|-------------------------------|------------------------------------------------------|------------------------------------------|----|-------------------------------------|-----------------------|----------------|---------------|------------------------------------------------------------------------------------------|-----------------------------------------------------------------|--------------------------------------------------------------------------------------------------|-------------------------------------------------------------------------------------------------------|---------------------------------------------------------------------------------------------------------------------|----------------------------------------|------------------|---------------------------------------------------------------------------------------------------|
| 1       | 6 yo  | F   | P               | p.Ala844Val, p.Asn525Thrfs*20 | Hypotonia in early infancy; spasticity, opisthotonus | Spastic quadriplegia                     | Y  | Congenital Microcephaly (<3 %ile)   | Cannot sit unassisted | Non-ambulatory | Nonverbal     | CVI                                                                                      | Congenital moderate SNHL (BL)                                   | Progressive atrophy and hypoplasia of corpus callosum                                            | None                                                                                                  | Abnormal                                                                                                            | FTT, constipation                      | Y                | N                                                                                                 |
| 2       | 9 yo  | F   | S of 1          | p.Ala844Val, p.Asn525Thrfs*20 | Spasticity requiring baclofen pump                   | Spastic quadriplegia                     | Y  | Congenital Microcephaly (<3 %ile)   | Cannot sit unassisted | Non-ambulatory | Nonverbal     | CVI                                                                                      | Congenital moderate-severe SNHL (BL)                            | Thin corpus callosum, small neonatal subdural hematoma                                           | Neonatal seizures only                                                                                | Abnormal                                                                                                            | FTT                                    | Y                | N                                                                                                 |
| 3       | 5 yo  | F   | P               | p.Ile788Serfs*47, p.Arg84Gln  | Axial hypotonia; Peripheral hypertonia               | Spastic                                  | Y  | Congenital Microcephaly (<1%ile)    | Cannot sit unassisted | Non-ambulatory | Nonverbal     | Strabismus                                                                               | Congenital SNHL (BL)                                            | Delayed myelination and possibly dysmyelination                                                  | Infantile spasms starting at 3 mos, epilepsy until 1 yo, currently none                               | Abnormal (Multifocal spikes)                                                                                        | FTT, G-tube                            | Y                | N                                                                                                 |
| 4       | 4 yo  | F   | P               | p.Ser448Leu, p.Arg186*        | Hypotonia                                            | None                                     | Y  | Acquired Microcephaly (2nd %ile)    | Cannot sit unassisted | Non-ambulatory | Nonverbal     | Discoordinated eye movements, exotropia, possible refractive amblyopia, small optic disc | Congenital moderate SNHL (BL)                                   | Normal                                                                                           | Seizures started at <2 yo (5-6 per day)                                                               | Abnormal (Generalized epilepsy)                                                                                     | FTT, GERD, constipation, vomiting      | N                | N                                                                                                 |
| 5       | 2 yo  | F   | P               | p.Ala100Thr, p.Arg186*        | Hypotonia; dystonia                                  | Dystonic spasms, opisthotonus            | Y  | Acquired Microcephaly (<3rd %ile)   | Cannot sit unassisted | Non-ambulatory | Nonverbal     | CVI                                                                                      | Congenital severe SNHL (BL)                                     | Hypomyelination                                                                                  | Epileptic spasms (10-12 per day), started at 3 mos                                                    | Abnormal                                                                                                            | FTT, G-tube, GERD                      | Not tested       | Not tested                                                                                        |
| 6       | 11 yo | M   | P               | p.Arg784Gln, p.Ser90Ile       | Hypotonia                                            | Spastic quadriplegia                     | Y  | Acquired Microcephaly (1st %ile)    | Cannot sit unassisted | Non-ambulatory | Nonverbal     | CVI, nystagmus                                                                           | Acquired mild SNHL (BL)                                         | Progressive diffuse atrophy; extra-axial arachnoid collections                                   | Intractable seizures started at 9 mos                                                                 | Abnormal (Generalized epilepsy, slow background and high voltage epileptiform discharges with frontal predominance) | Does not eat solid food                | N                | Severe chronic autoimmune thrombocytopenia noted at birth, platelet counts ranging ~20,000-55,000 |
| 7       | 6 yo  | F   | S of 6          | p.Arg784Gln, p.Ser90Ile       | Hypotonia                                            | None                                     | Y  | Acquired Microcephaly (<3rd %ile)   | 3 yo                  | Unknown        | Has one word  | Unknown                                                                                  | Acquired mild-moderate SNHL (BL)                                | Normal                                                                                           | One "seizure-like" episode at 2 mos                                                                   | Abnormal (Fragmented generalized discharges up to 2 seconds, no clinical events)                                    | Constipation                           | N                | Platelet counts ranging ~20,000-55,000                                                            |
| 8       | 19 yo | M   | P               | p.Asp628Gly, p.Arg529Gln      | Peripheral hypertonia                                | Spastic quadriplegia, retrocollis        | Y  | Unknown                             | Unknown               | Non-ambulatory | Nonverbal     | CVI, nystagmus                                                                           | SNHL (BL)                                                       | Cortical atrophy; Immature myelination in occipital and frontal regions; Possible coronal suture | Seizures                                                                                              | Abnormal (Epileptic encephalopathy)                                                                                 | G-tube                                 | Y                | Y                                                                                                 |
| 9       | 14 yo | F   | S of 8          | p.Asp628Gly, p.Arg529Gln      | Axial hypotonia                                      | None                                     | Y  | Microcephaly                        | Unknown               | Unknown        | Unknown       | CVI, nystagmus                                                                           | SNHL (BL)                                                       | N/A                                                                                              | Absence, myoclonic, and tonic seizures                                                                | Abnormal                                                                                                            | None                                   | Unknown          | Unknown                                                                                           |
| 10      | 8 yo  | M   | P               | p.Trp626Cys, c.1714+1G>A      | Hypertonia                                           | Spastic                                  | Y  | Microcephaly (<3rd %ile)            | Cannot sit unassisted | Non-ambulatory | Nonverbal     | CVI                                                                                      | Congenital profound SNHL (BL) cochlear implant and hearing aids | Normal                                                                                           | Infantile spasms, tonic seizures started at 7 mos                                                     | Abnormal (Multifocal spikes)                                                                                        | GERD, G-tube                           | N                | N                                                                                                 |
| 11      | 3 yo  | M   | S of 10         | p.Trp626Cys, c.1714+1G>A      | Hypotonia                                            | None                                     | Y  | Microcephaly (<3rd %ile)            | Cannot sit unassisted | Non-ambulatory | Nonverbal     | CVI                                                                                      | Congenital severe SNHL (BL)                                     | N/A                                                                                              | Infantile spasms, myoclonic seizures, cluster spasms started at 5 mos                                 | Abnormal (Multifocal spikes)                                                                                        | G-tube, GERD                           | N                | N                                                                                                 |
| 12      | 5 yo  | M   | P               | p.Asp628Gly, p.Tyr559*        | Hypotonia                                            | Tonus dysregulation                      | Y  | Normal (70th %ile)                  | Cannot sit unassisted | Non-ambulatory | Nonverbal     | Strabismus                                                                               | Acquired moderate SNHL (BL), diagnosed at 3 mos                 | Enlarged cerebrospinal fluid spaces, probable brain atrophy                                      | History of infantile spasms; tonic seizures, seizures with eye deviation (10-15/wk) started at 11 mos | Abnormal (Slow background and bilateral occipital spike-and-wave complexes)                                         | Severe constipation, PEG tube feedings | N                | N                                                                                                 |
| 13      | 11 yo | F   | P               | p.Thr330del                   | Axial hypotonia; hypertonia in extremities           | None                                     | Y  | Microcephaly (<1st %ile)            | Cannot sit unassisted | Non-ambulatory | Nonverbal     | CVI, exotropia, mildly speckled aspect of retina                                         | Congenital severe SNHL (BL)                                     | Normal                                                                                           | History of infantile spasms starting at 5 mos; tonic seizures                                         | Abnormal (Hypsarrhythmia)                                                                                           | Trouble eating solid food              | N                | N                                                                                                 |
| 14      | 4 yo  | M   | P               | p.Arg84Gln                    | Hypotonia                                            | Truncal hypotonia, peripheral spasticity | Y  | Congenital Microcephaly (<3rd %ile) | Cannot sit unassisted | Non-ambulatory | Nonverbal     | Myopia, astigmatism, visual disinterest                                                  | Congenital severe SNHL (BL)                                     | Normal                                                                                           | Seizures started at 1 yo                                                                              | Abnormal (Frequent brief generalized error bursts of irregular spike and slow-wave activity)                        | FTT                                    | N                | N                                                                                                 |

Abbreviations are as follows: DD, developmental delay; EEG, electroencephalogram; FTT, failure to thrive; CVI, cortical visual impairment; GI, gastrointestinal issues; GERD, gastroesophageal reflux disease; SNHL (BL), sensorineural hearing loss (bilateral); ADHD, attention deficit/hyperactivity disorder
